# Supplementary material for: Cell-Type Heterogeneity in Adipose Tissue Is Associated with Complex Traits and Reveals Disease-Relevant Cell-Specific eQTLs
Source: PubMed Central journal article supplement (PMC6556877; doi:10.1016/j.ajhg.2019.03.025), 2019-05-23
Supplement: mmc1.pdf [file mmc1.pdf]

**The American Journal of Human Genetics, Volume 104**

**Supplemental Data**

**Cell-Type Heterogeneity in Adipose Tissue Is  
Associated with Complex Traits and Reveals  
Disease-Relevant Cell-Specific eQTLs**

**Craig A. Glastonbury, Alexessander Couto Alves, Julia S. El-Sayed Moustafa, and Kerrin S. Small**

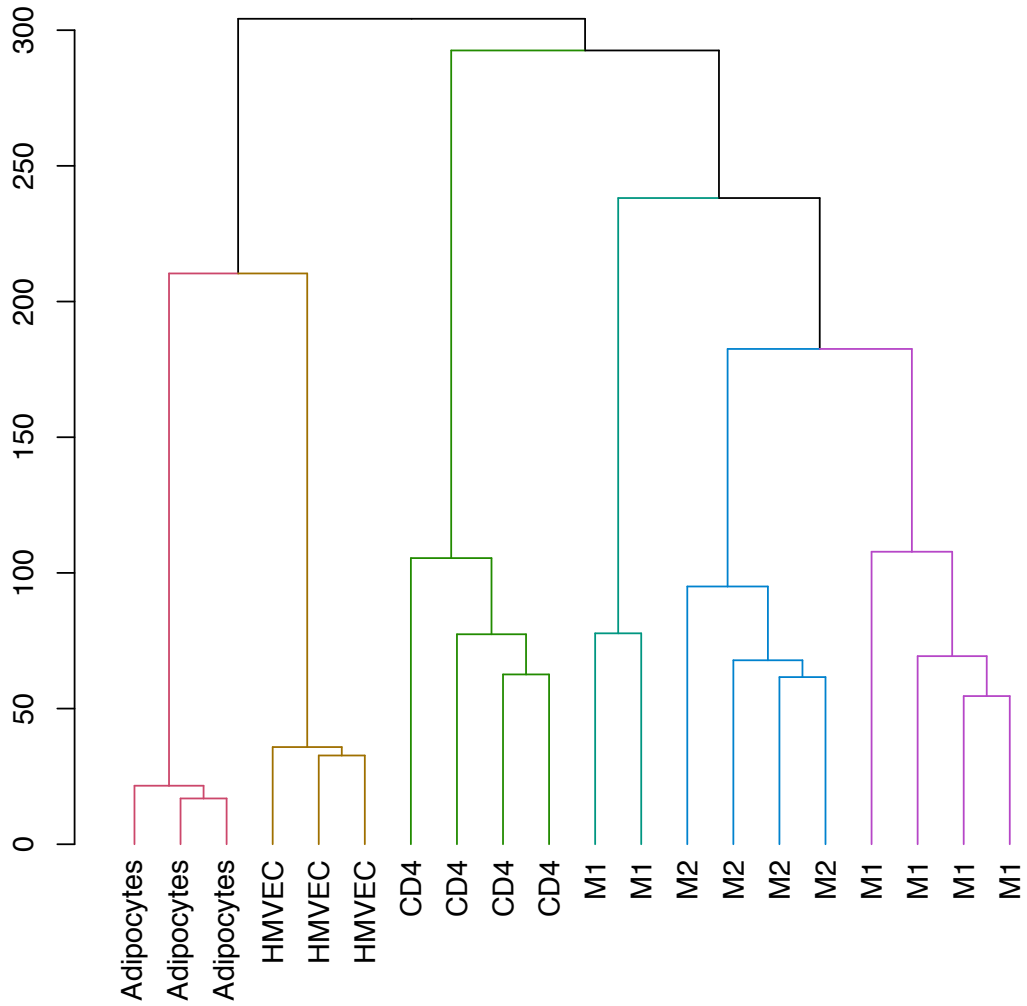

Figure S1: **Hierarchical clustering of reference cells that are used to produce the signature matrix.** Coloured by unsupervised k-means clustering (where  $k = 5$ ). Biological hierarchy recapitulated: Non-immune (Adipocytes, MVEC) and immune cell fractions (Macrophage and CD4+ t-cells) cluster separately

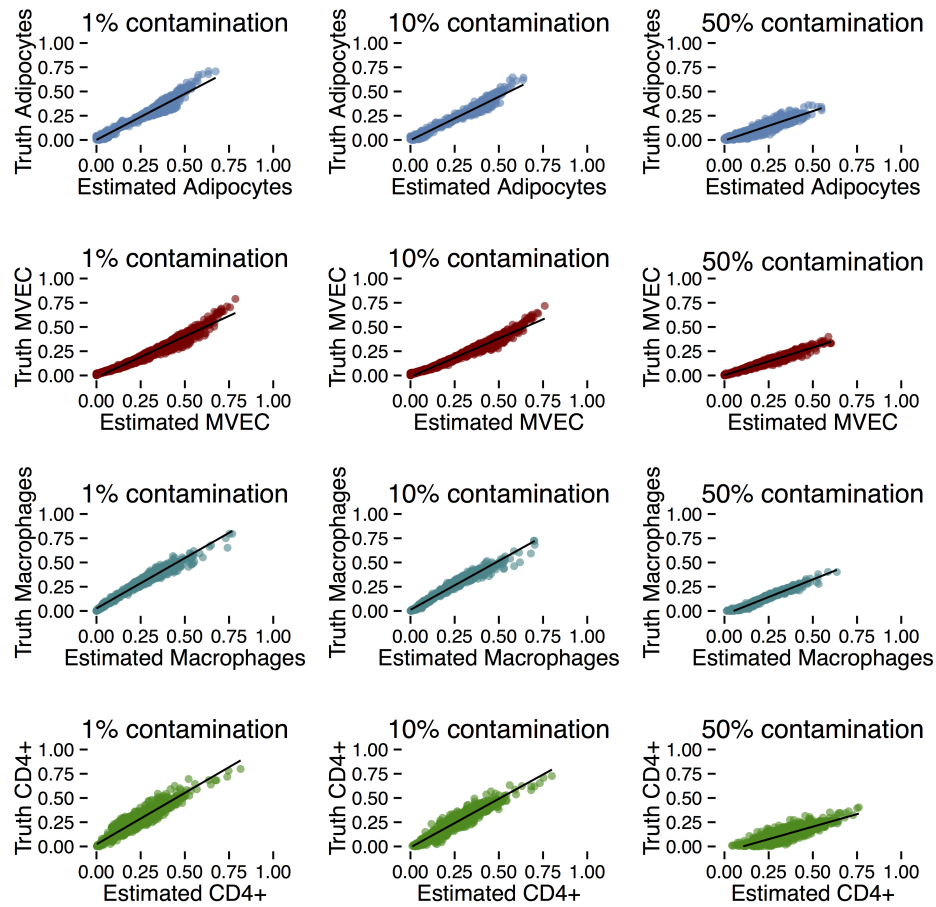

Figure S2: **Effect of *In-silico* cell type estimation with unknown content added.** Additional cell types known to be present in adipose tissue (Fibroblasts, Neutrophils & Dendritic Cells) but that are not estimated by the adipose signature matrix, were included in simulated adipose tissue mixtures (Adipocytes, CD4+, MVEC, Macrophages) to assess estimation accuracy with varying amounts of unknown content. The adipose tissue signature matrix is robust to unknown cell types, with cell estimates maintaining a highly linear relationship with ground truth data. An unlikely scenario of 50% unaccounted for mixture content, resulted in systematic overestimation, yet a linear relationship was still maintained.

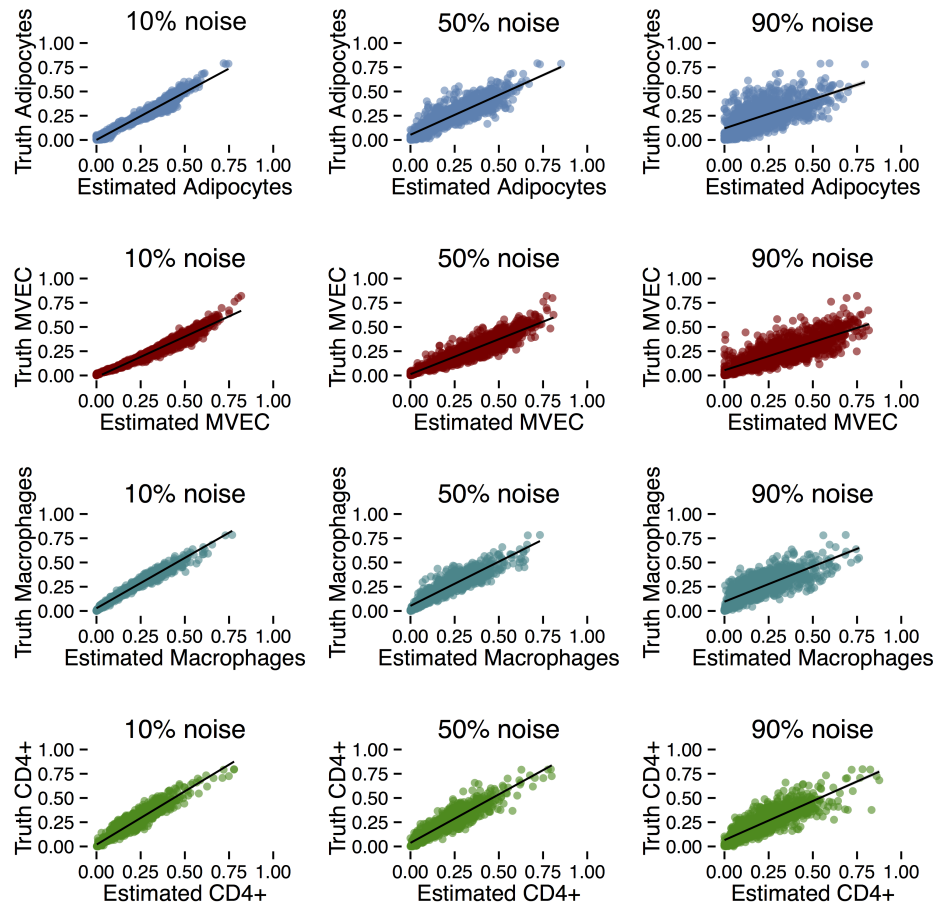

Figure S3: **Effect of noise on deconvolving cell types.** Cells type estimates from *in-silico* simulations with added scaled Gaussian noise (10, 50, 90% respectively).

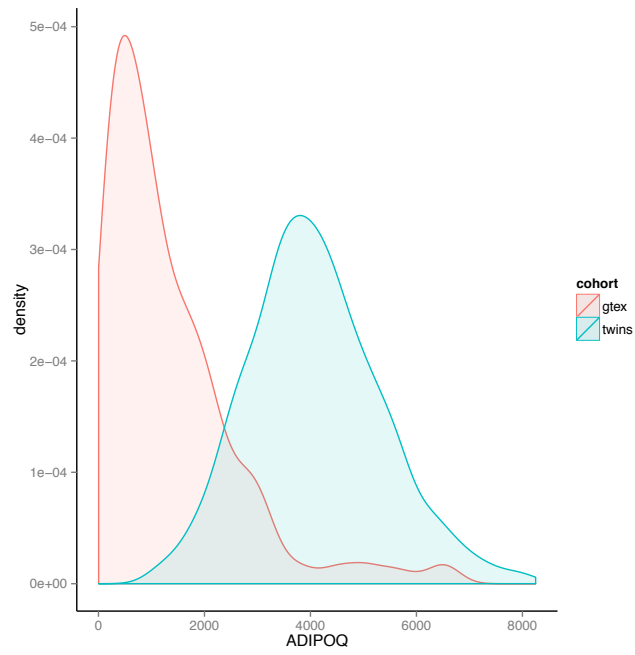

Figure S4: **Distribution of ADIPOQ expression.** Expression of ADIPOQ (TMM) in TwinsUK and GTEx samples have strikingly different distributions.

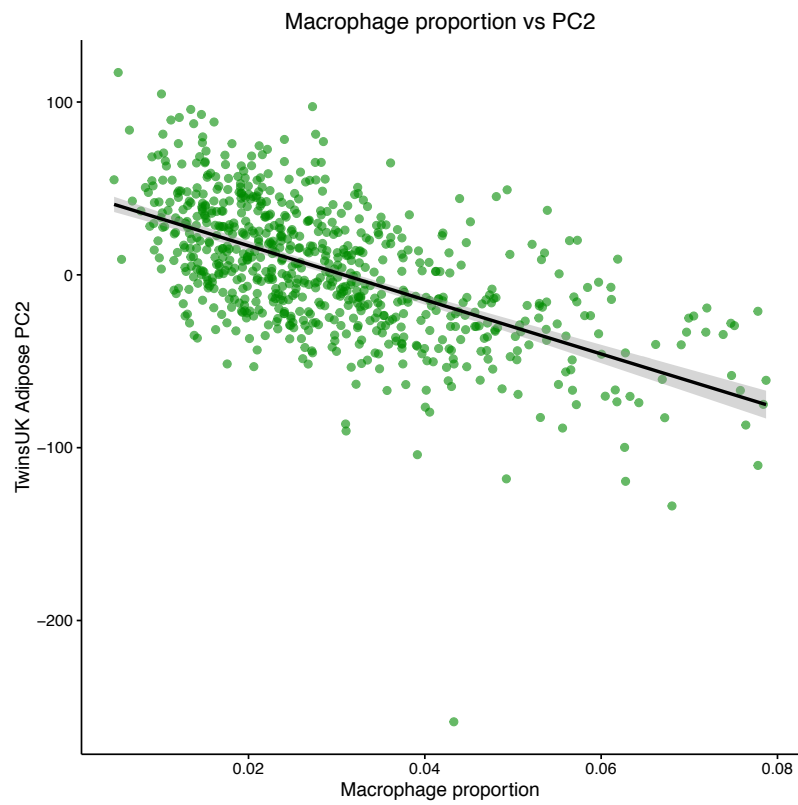

Figure S5: **Macrophage proportion vs gene expression PCs.** Adipose tissue RNA-seq PC2 captures macrophage proportion heterogeneity amongst samples.

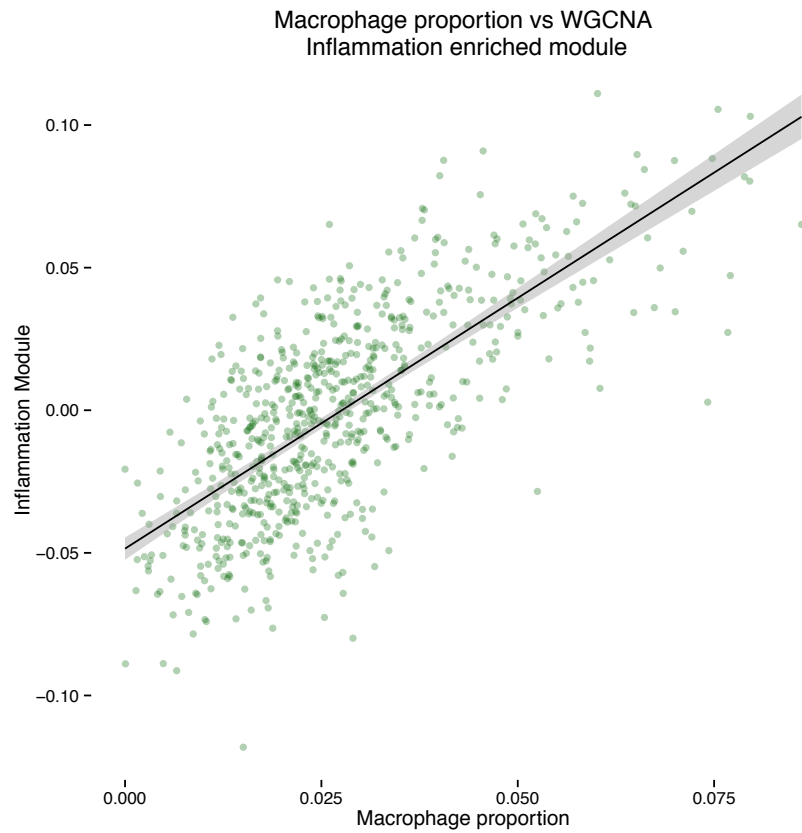

(A) Correlation of the inflammation enriched module with estimated macrophage proportion.

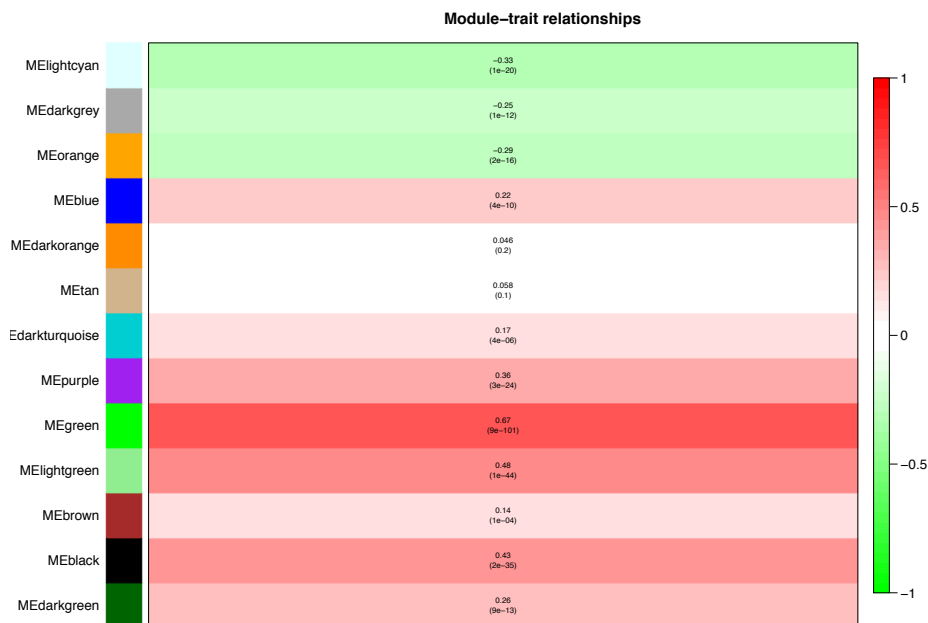

(B) Correlation of macrophage proportion with all WGCNA modules.

Figure S6: WGCNA modules and their correlation to macrophage proportion in subcutaneous adipose tissue.

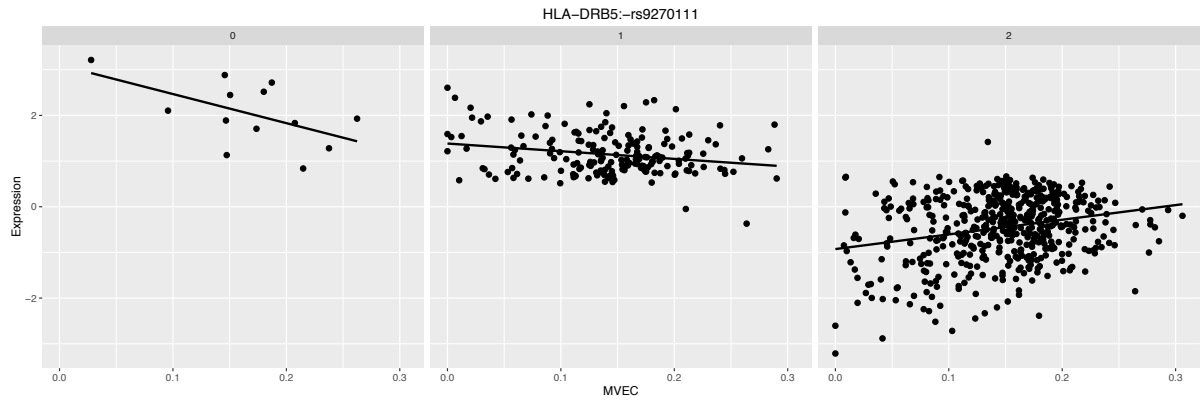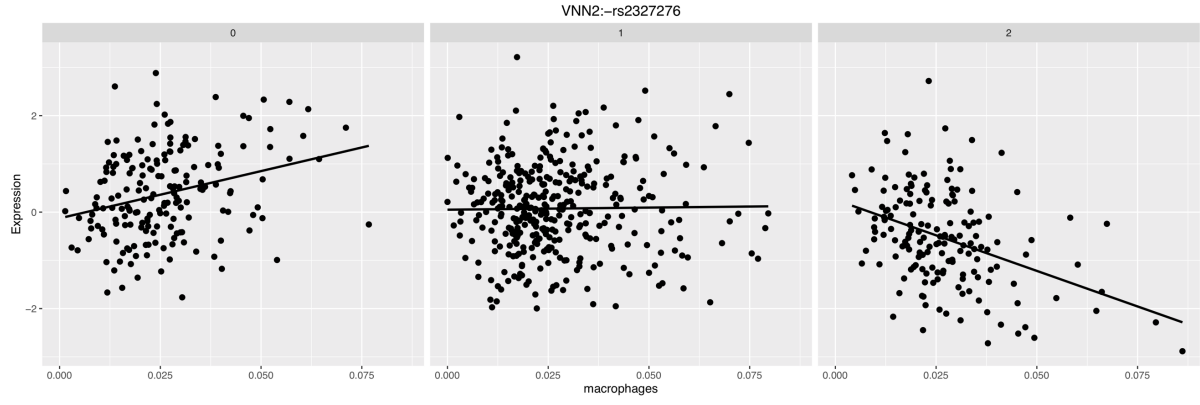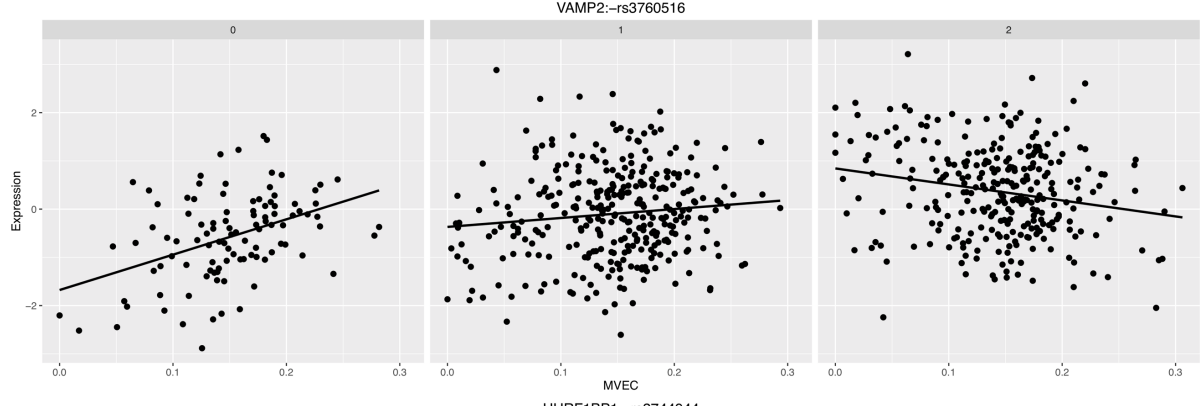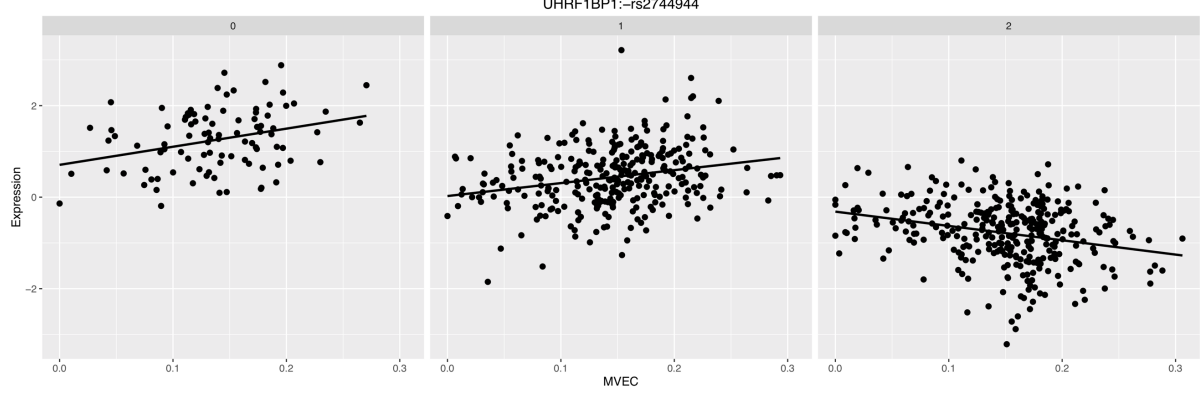



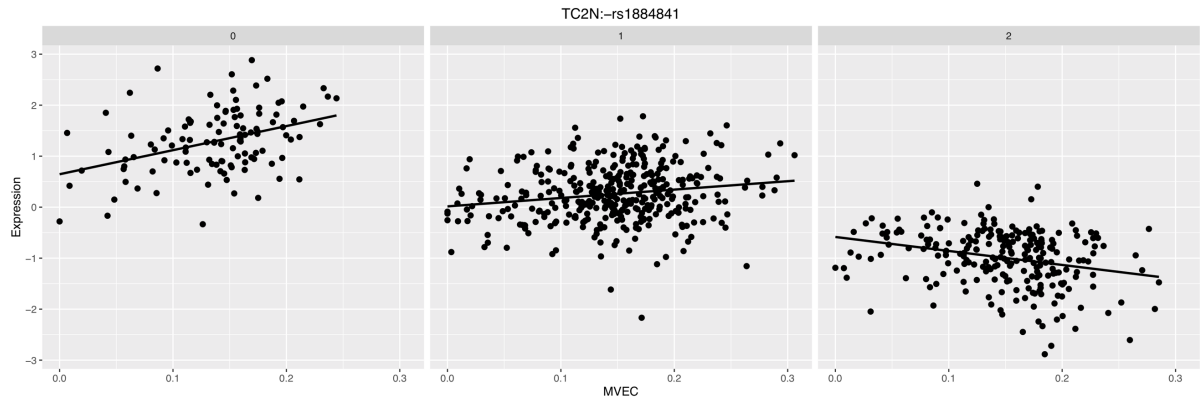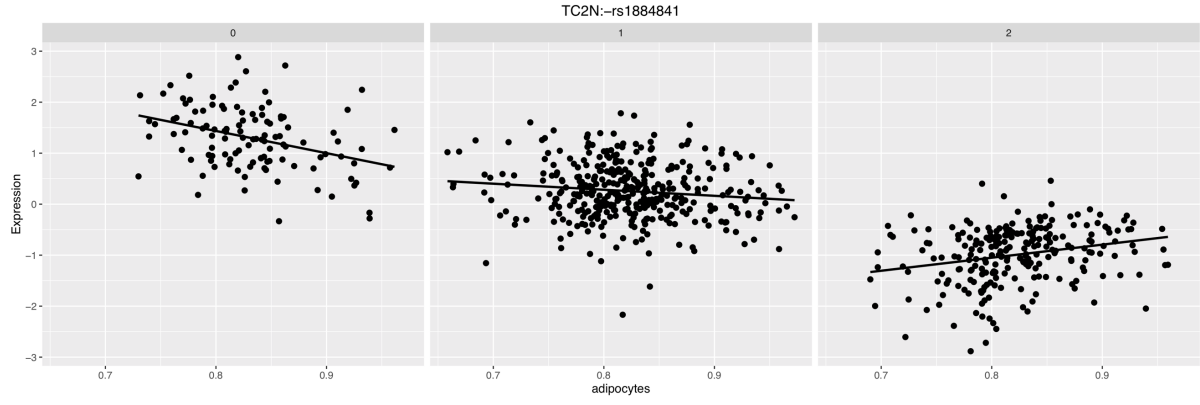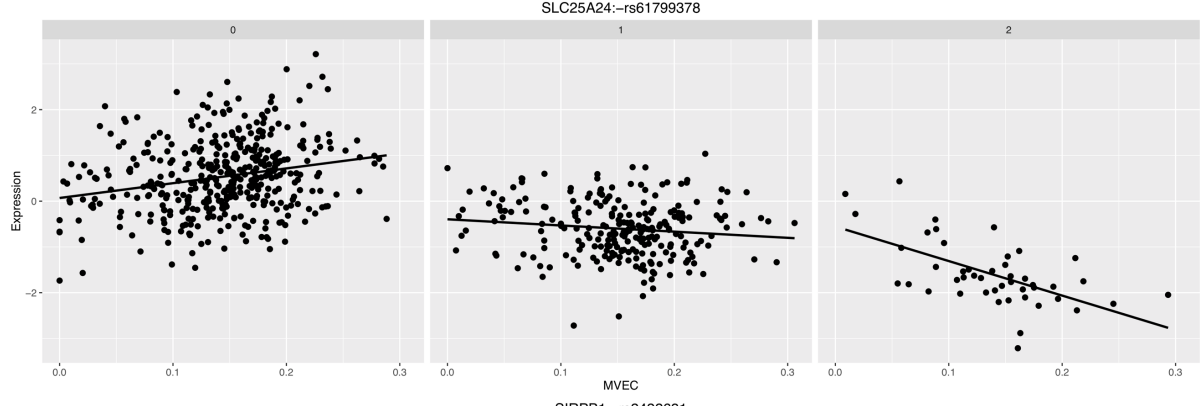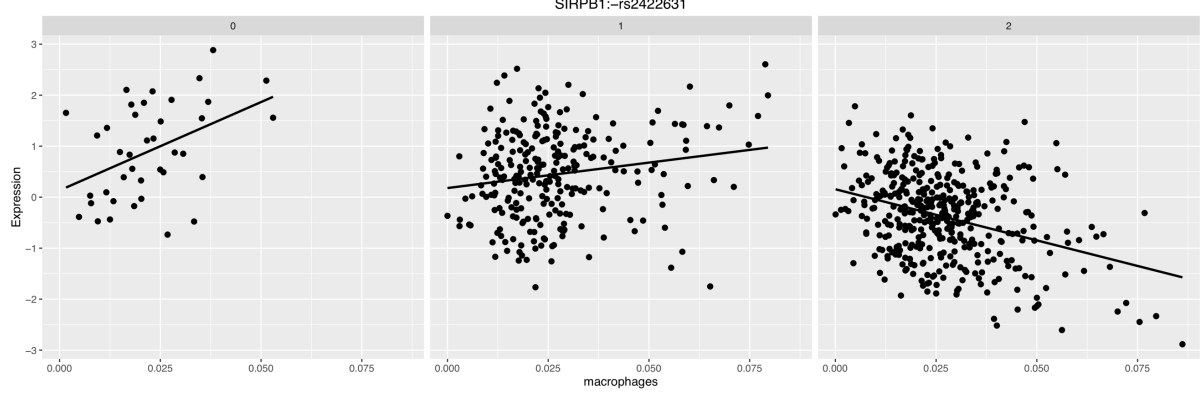

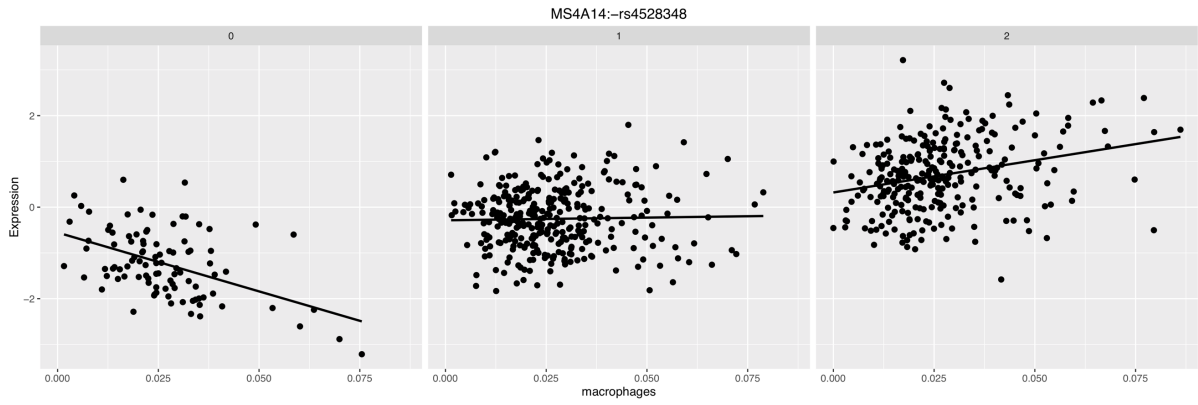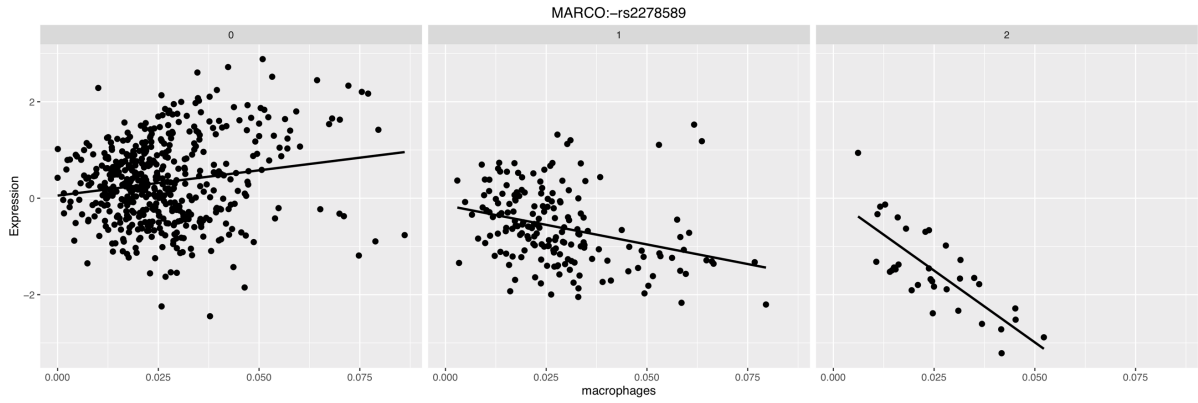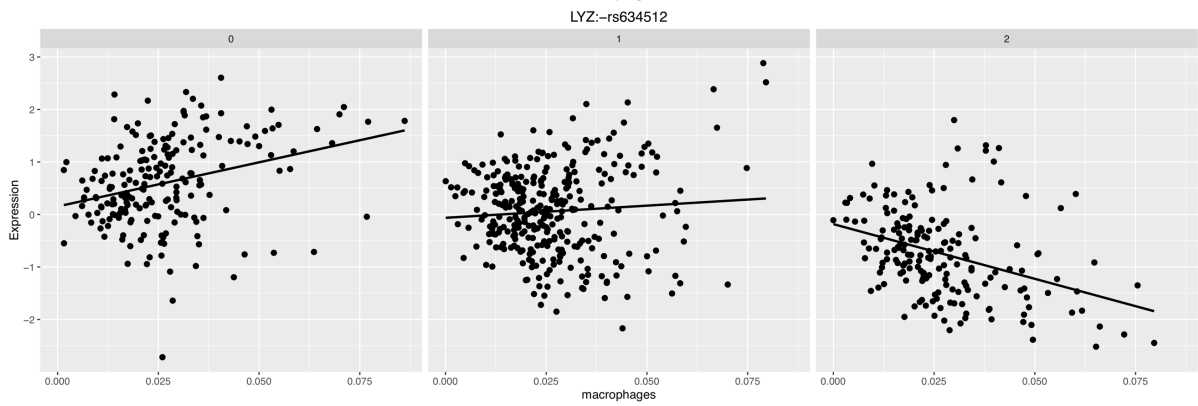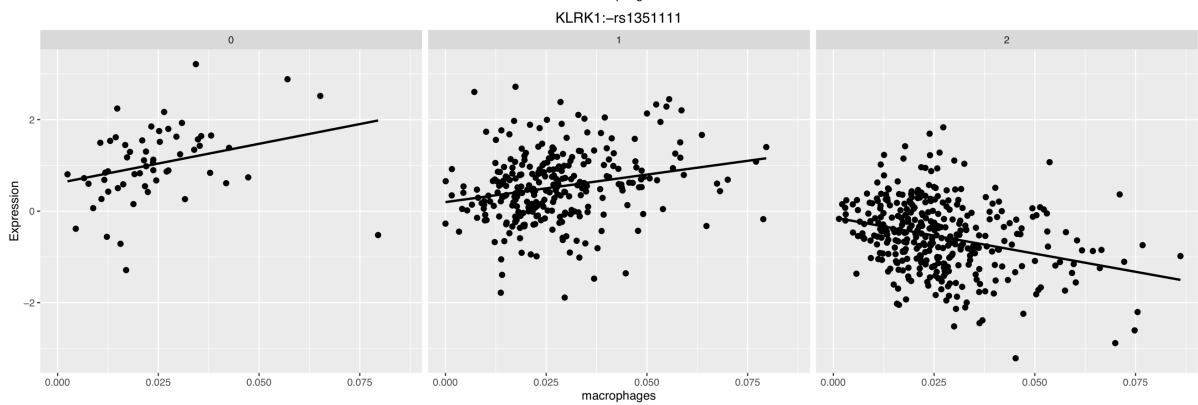

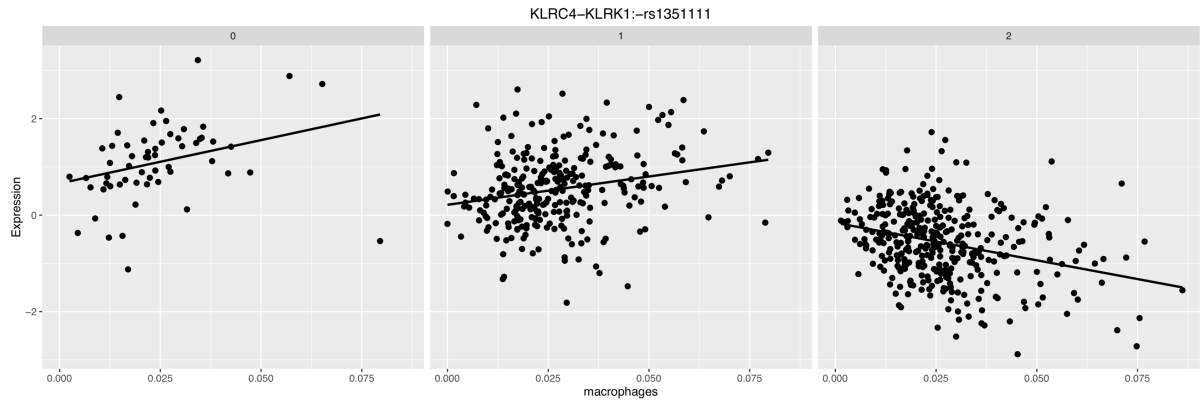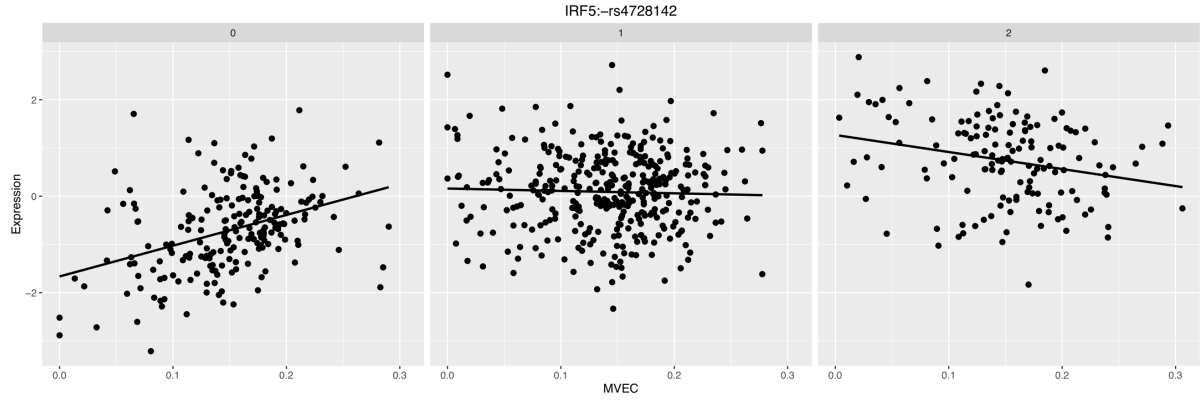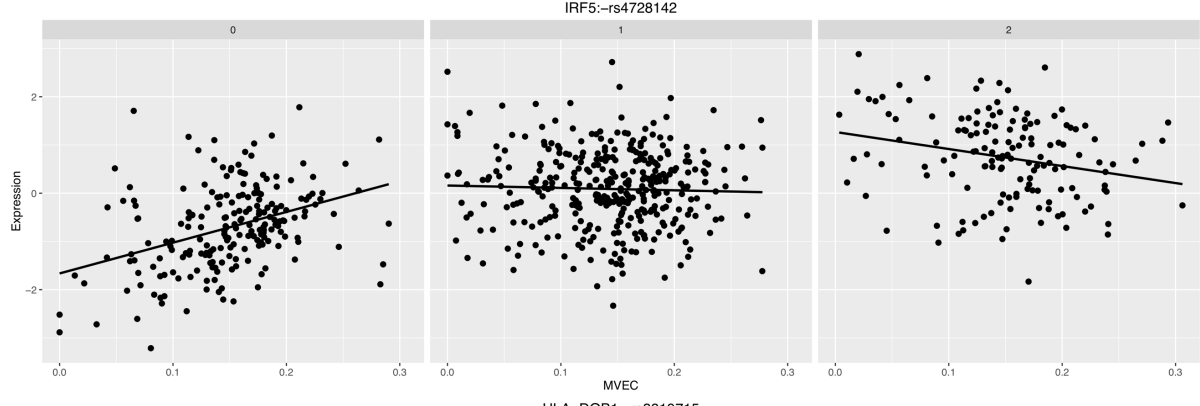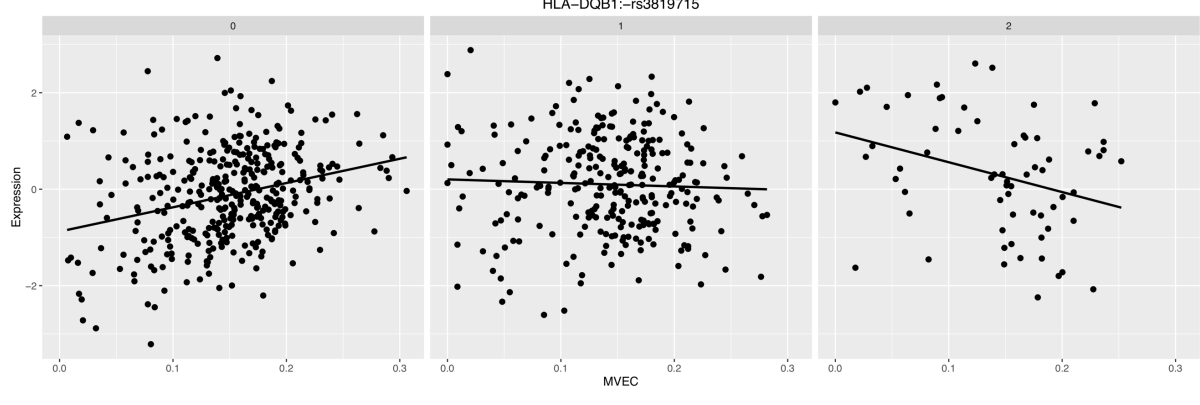

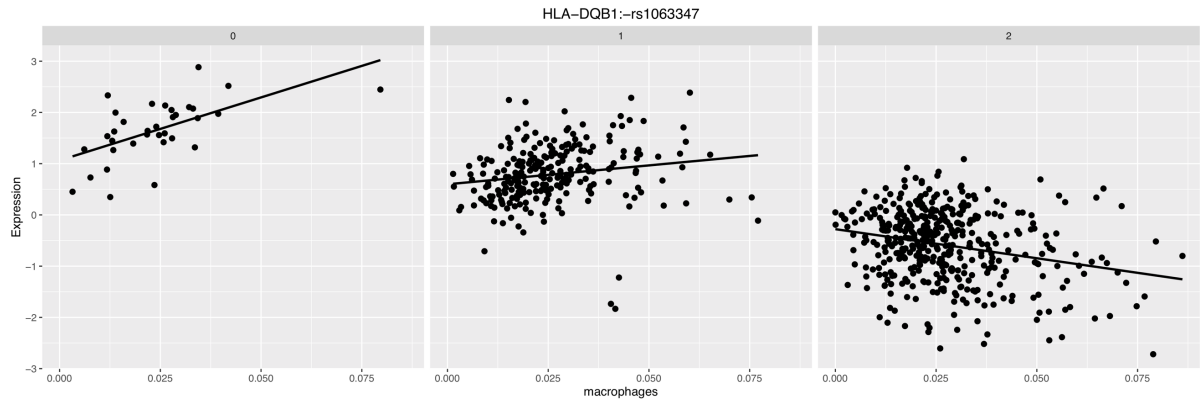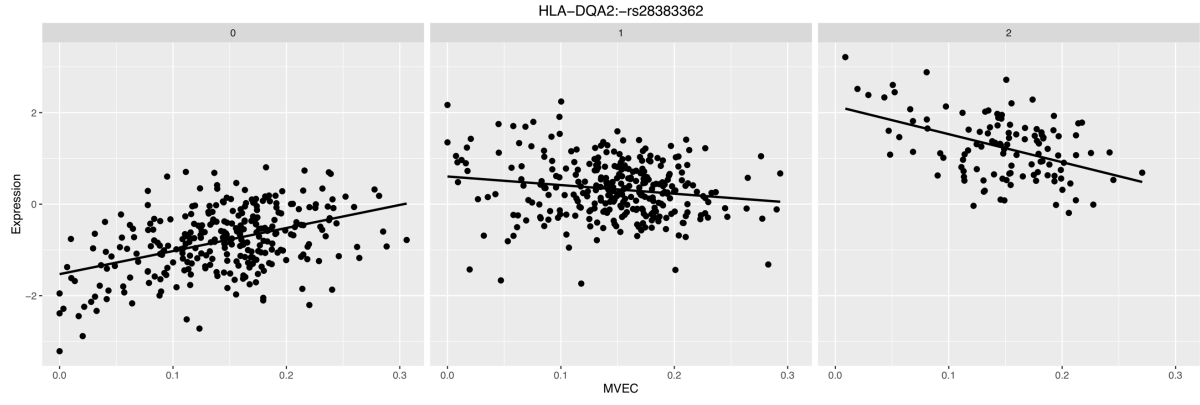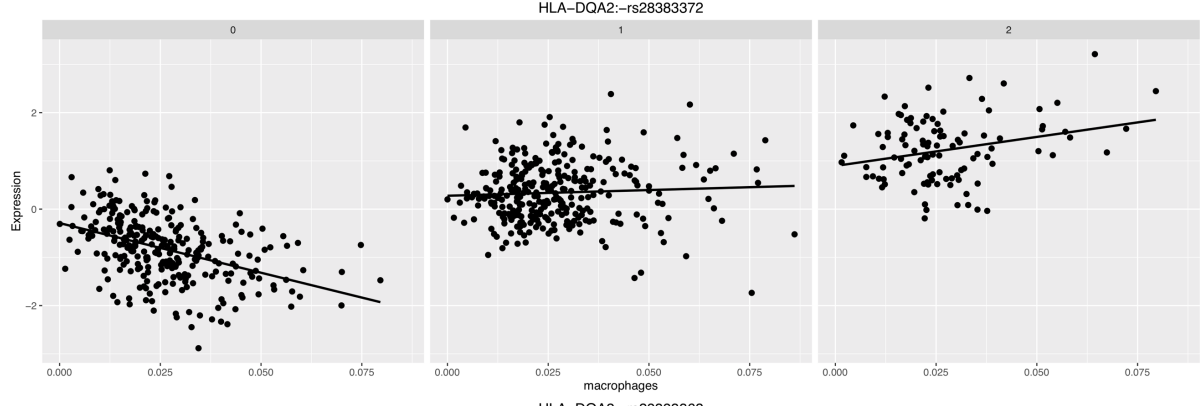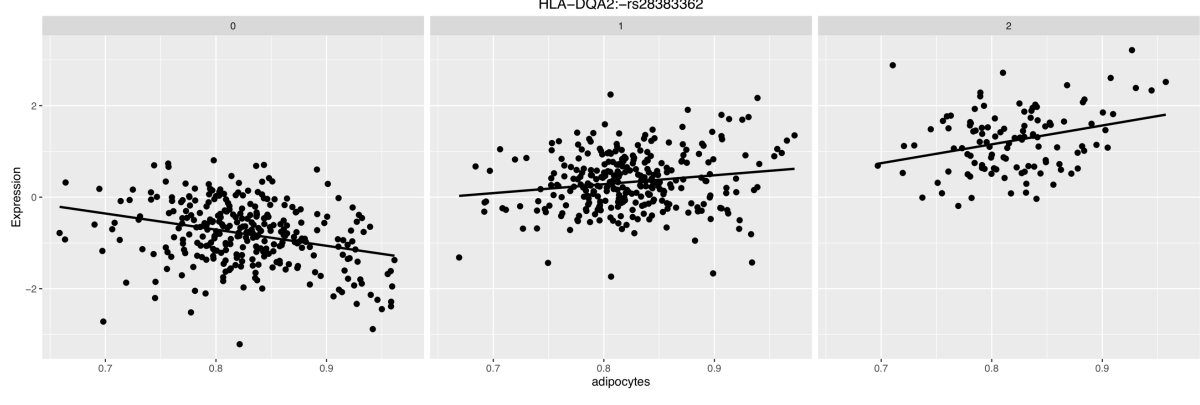

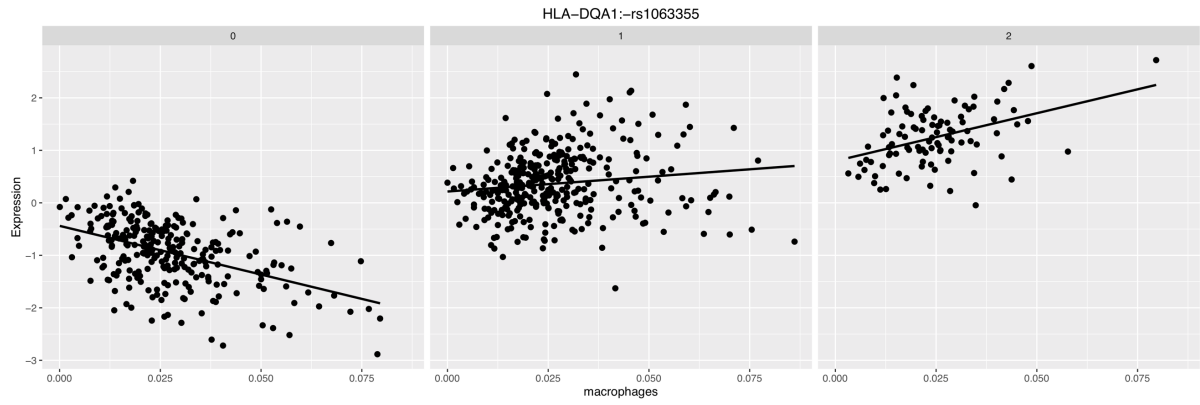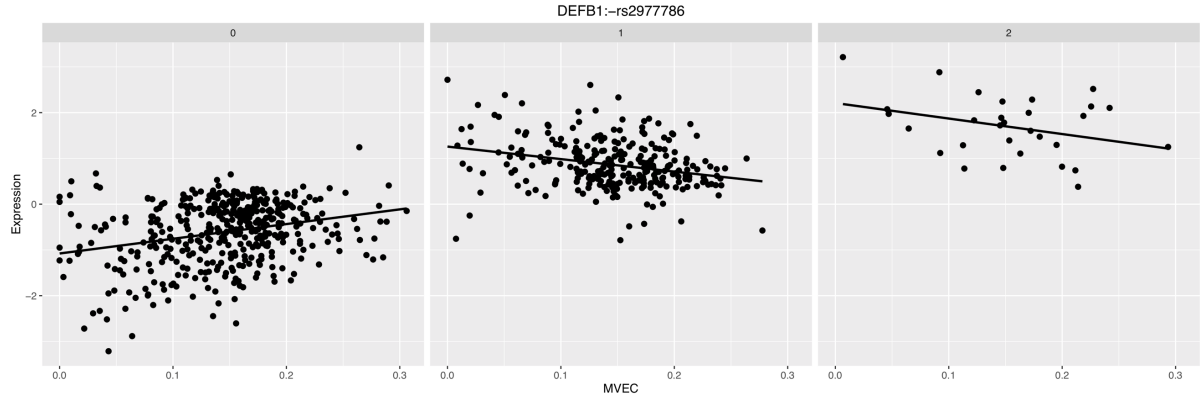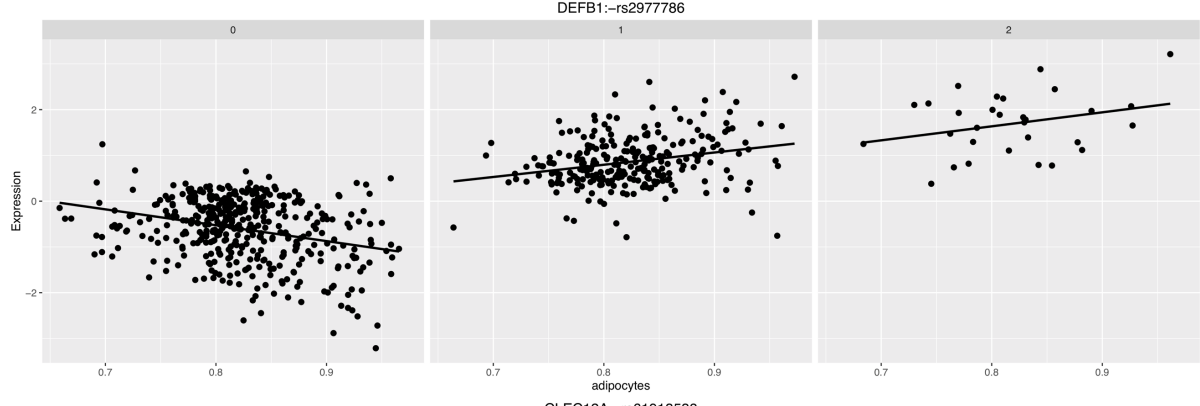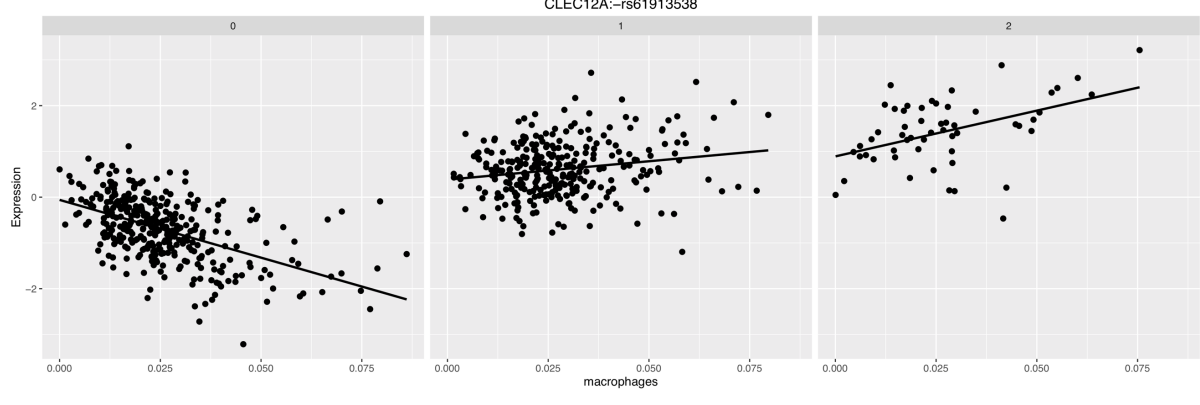

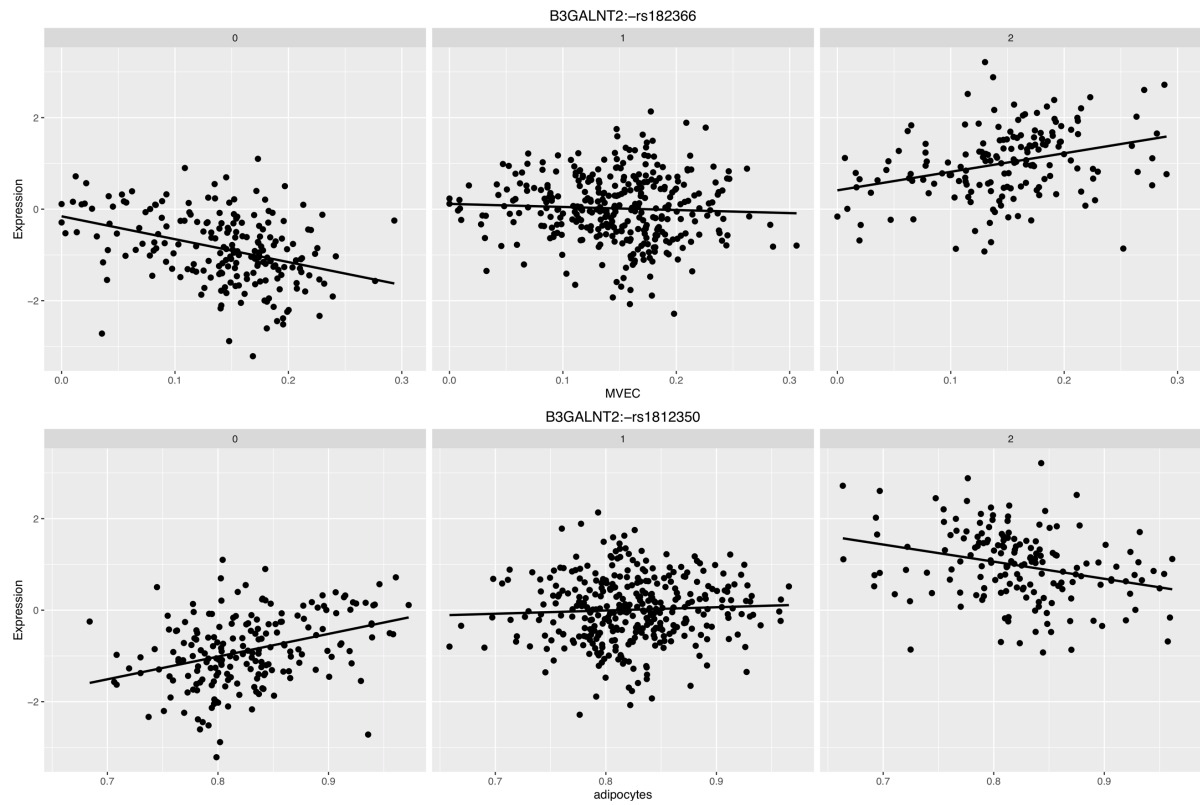

Figure S7: All 26 GxCell interactions plotted. Cell proportion (x-axis) and gene expression (y-axis) separated by genotype dosage (0, 1, 2)

| Cell type         | Citation                | SRA accession                                                                                              |
|-------------------|-------------------------|------------------------------------------------------------------------------------------------------------|
| White adipocyte   | (Moisan et al. 2015)    | SRR1296133, SRR1296134, SRR1296135                                                                         |
| T-cell (CD4+)     | (Weinstein et al. 2014) | SRR1422906, SRR1422907, SRR1422908, SRR1422909                                                             |
| HMVEC             | (DiMaio et al. 2016)    | SRR2776477, SRR2776478, SRR2776479                                                                         |
| M1/M2 macrophages | (Zhang et al. 2015)     | SRR2910670, SRR2910671, SRR2939145, SRR2939146, SRR2939148, SRR2939149, SRR2939150, SRR2939151, SRR2939152 |

Table S3: **Dataset sources for signature matrix.** Purified cell RNA-seq data from SRA used to construct Adipose tissue signature matrix

| Cell type   | Adipocytes (%) | CD4+ t-cell (%) | MVEC (%)    | M1 Macrophage (%) | M2 Macrophage (%) |
|-------------|----------------|-----------------|-------------|-------------------|-------------------|
| Adipocytes  | <b>99.5</b>    | 0.003           | 0           | 0.001             | 0                 |
| CD4+ t-cell | 0              | <b>100</b>      | 0           | 0                 | 0                 |
| MVEC        | 0.9            | 0               | <b>98.8</b> | 0                 | 0                 |
| Macrophage  | 0              | <b>5.6</b>      | 0           | <b>1</b>          | <b>93.3</b>       |

Table S5: **Estimates of purified cell types.** Cell type (%) estimates when applying the adipose tissue signature matrix to four independent samples of purified cells. Top row represents cells present in adipose tissue signature matrix. Left most column represents independent set of purified cell RNA-seq profiles.

| Study                                      | Cell type         | Proportion (%) | Sample size | Sex | Age   | Correlated with adiposity? |
|--------------------------------------------|-------------------|----------------|-------------|-----|-------|----------------------------|
| <a href="#">Travers et al. (2015)</a>      | CD4+              | 3-4.7          | 17          | M   | 35-55 | n.s                        |
|                                            | CD8+              | 0.5-5.7        | -           | -   | -     | n.s                        |
|                                            | Macrophages       | 2.9 - 15.5     | -           | -   | -     | P <0.05 (+)                |
| <a href="#">Zimmerlin et al. (2010)</a>    | Endothelial cells | 15.4 ± 4.8     | 8           | F   | -     | not tested                 |
| <a href="#">Van Harmelen et al. (2003)</a> | Adipocytes        | 85             | 49          | M/F | 16-73 | P <0.05 (+)                |

Table S6: **Previous published estimates of adipose cell types.** Estimates from several studies that flow sorted subcutaneous adipose tissue to measure cell proportions and their relationship with adiposity.
